# Supplementary material for: Synthesis and cation distribution in the new bismuth oxyhalides with the Sillén–Aurivillius intergrowth structures
Source: Royal Society of Chemistry journal article supplement (doi:10.1039/c5dt02620b), 2015-01-01
Supplement: c5dt02620b1.pdf [file c5dt02620b1.pdf]

**Supplementary material**

(to the paper “Synthesis and cation distribution in the new bismuth oxyhalides with the Sillén – Aurivillius intergrowth structures” by D.O. Charkin, V.S. Akinfiev, A.M. Alekseeva, M. Batuk, A.M. Abakumov, and S.M. Kazakov)

**Table S1.** Atomic coordinates and displacement parameters for Ba<sub>2</sub>Bi<sub>3</sub>Nb<sub>2</sub>O<sub>11</sub>I, Ca<sub>1.25</sub>Sr<sub>0.75</sub>Bi<sub>3</sub>Nb<sub>2</sub>O<sub>11</sub>Cl and BaCaBi<sub>3</sub>Nb<sub>2</sub>O<sub>11</sub>Br

| Atom      | Site                       | Ba <sub>2</sub> Bi <sub>3</sub> Nb <sub>2</sub> O <sub>11</sub> I |                          |                                          | Ca <sub>1.25</sub> Sr <sub>0.75</sub> Bi <sub>3</sub> Nb <sub>2</sub> O <sub>11</sub> Cl |                            |                                          | BaCaBi <sub>3</sub> Nb <sub>2</sub> O <sub>11</sub> Br |                          |                                          |
|-----------|----------------------------|-------------------------------------------------------------------|--------------------------|------------------------------------------|------------------------------------------------------------------------------------------|----------------------------|------------------------------------------|--------------------------------------------------------|--------------------------|------------------------------------------|
|           |                            | <i>z</i>                                                          | Occupancy                | <i>U</i> <sub>iso</sub> , Å <sup>2</sup> | <i>z</i>                                                                                 | Occupancy                  | <i>U</i> <sub>iso</sub> , Å <sup>2</sup> | <i>z</i>                                               | Occupancy                | <i>U</i> <sub>iso</sub> , Å <sup>2</sup> |
| <i>A</i>  | 1 <i>a</i> (0 0 0)         | 0                                                                 | 0.93(1) Ba<br>0.07(1) Bi | 0.0421(7)                                | 0                                                                                        | 0.596(7) Ca<br>0.404(7) Sr | 0.0187(9)                                | 0                                                      | 1 Ca                     | 0.028(6)                                 |
| <i>M1</i> | 2 <i>g</i> (0 0 <i>z</i> ) | 0.2355(1)<br>0.2666(1)                                            | 0.56(1) Ba<br>0.44(1) Bi | 0.035(1)<br>0.0395(8)                    | 0.26368(5)                                                                               | 0.645(2) Bi<br>0.355(2) Ca | 0.0239(3)                                | 0.237(2)<br>0.264(1)                                   | 0.50(1) Ba<br>0.50(1) Bi | 0.013(7)<br>0.022(3)                     |
| <i>M2</i> | 2 <i>h</i> (½ ½ <i>z</i> ) | 0.3818(1)                                                         | 1 Bi                     | 0.0374(3)                                | 0.39413(4)                                                                               | 0.878(3) Bi<br>0.122(3) Sr | 0.0145(3)                                | 0.3893(1)                                              | 1 Bi                     | 0.013(2)                                 |
| Nb        | 2 <i>h</i> (½ ½ <i>z</i> ) | 0.1131(1)                                                         | 1 Nb                     | 0.0324(6)                                | 0.11221(7)                                                                               | 1 Nb                       | 0.0098(4)                                | 0.1090(2)                                              | 1 Nb                     | 0.003(1)                                 |
| X         | 1 <i>b</i> (0 0 ½)         | ½                                                                 | 1 I                      | 0.0429(7)                                | ½                                                                                        | 1 Cl                       | 0.031(2)                                 | ½                                                      | 1 Br                     | 0.020(2)                                 |
| O1        | 1 <i>c</i> (½ ½ 0)         | 0                                                                 | 1 O                      | 0.024(4)                                 | 0                                                                                        | 1 O                        | 0.037(4)                                 | 0                                                      | 1 O                      | 0.042(7)                                 |
| O2        | 8 <i>s</i> (0 <i>xz</i> )  | 0.1052(4) <sup>1</sup>                                            | 1 O                      | 0.030(2)                                 | <i>x</i> = 0.601(1)<br><i>z</i> = 0.1012(5)                                              | 0.5 O                      | 0.033(3)                                 | <i>x</i> = 0.599(1)<br><i>z</i> = 0.104(1)             | 0.5 O                    | 0.036(8)                                 |
| O3        | 2 <i>h</i> (½ ½ <i>z</i> ) | 0.2074(5)                                                         | 1 O                      | 0.028(3)                                 | 0.2175(4)                                                                                | 1 O                        | 0.028(3)                                 | 0.209(1)                                               | 1 O                      | 0.027(7)                                 |
| O4        | 4 <i>i</i> (0 ½ <i>z</i> ) | 0.3287(4)                                                         | 1 O                      | 0.042(2)                                 | 0.3360(3)                                                                                | 1 O                        | 0.014(2)                                 | 0.330(1)                                               | 1 O                      | 0.028(6)                                 |

<sup>1</sup>Site 4*i* (0 ½ *z*)

**Table S2.** Selected interatomic distances (in Å) for Ba<sub>2</sub>Bi<sub>3</sub>Nb<sub>2</sub>O<sub>11</sub>I, Ca<sub>1.25</sub>Sr<sub>0.75</sub>Bi<sub>3</sub>Nb<sub>2</sub>O<sub>11</sub>Cl and BaCaBi<sub>3</sub>Nb<sub>2</sub>O<sub>11</sub>Br

|                | Ba <sub>2</sub> Bi <sub>3</sub> Nb <sub>2</sub> O <sub>11</sub> I | Ca <sub>1.25</sub> Sr <sub>0.75</sub> Bi <sub>3</sub> Nb <sub>2</sub> O <sub>11</sub> Cl | BaCaBi <sub>3</sub> Nb <sub>2</sub> O <sub>11</sub> Br |
|----------------|-------------------------------------------------------------------|------------------------------------------------------------------------------------------|--------------------------------------------------------|
| <i>A</i> –8O2  | 2.822(1)                                                          | 2.432(7)                                                                                 | 2.51(3)                                                |
| 4O1            | 2.851(7)                                                          | 2.7423(1)                                                                                | 2.763(1)                                               |
| <i>M1</i> –4O4 | Ba 2.664(6) Bi 2.322(5)                                           | 2.352(4)                                                                                 | Ba 2.62(3) Bi 2.31(2)                                  |
| 4O3            | Ba 2.875(4) Bi 3.038(4)                                           | 2.871(2)                                                                                 | Ba 2.81(1) Bi 2.96(1)                                  |
| <i>M2</i> –4O4 | 2.247(4)                                                          | 2.214(3)                                                                                 | 2.25(1)                                                |
| 1O3            | 3.35(1)                                                           | 3.249(8)                                                                                 | 3.215(4)                                               |
| 4 <i>X</i>     | 3.6246(6)                                                         | 3.3631(4)                                                                                | 3.463(4)                                               |
| Nb–1O3         | 1.83(1)                                                           | 1.935(8)                                                                                 | 1.88(2)                                                |
| 4O2            | 2.0007(7)                                                         | 1.987(2)                                                                                 | 1.993(7)                                               |
| 1O1            | 2.181(2)                                                          | 2.063(1)                                                                                 | 2.057(4)                                               |

**Table S3.** Atomic coordinates and displacement parameters for Sr<sub>2</sub>Bi<sub>3</sub>Nb<sub>2</sub>O<sub>11</sub>Cl

| Atom      | Site                      | <i>z</i>                                    | Occupancy                | U <sub>iso</sub> , Å <sup>2</sup> |
|-----------|---------------------------|---------------------------------------------|--------------------------|-----------------------------------|
| <i>A</i>  | 1 <i>a</i> (000)          | 0                                           | 0.94(1) Sr<br>0.06(1) Bi | 0.011(1)                          |
| <i>M1</i> | 2 <i>g</i> (00 <i>z</i> ) | 0.2646(1)                                   | 0.40(1) Sr<br>0.60(1) Bi | 0.032(1)                          |
| <i>M2</i> | 2 <i>h</i> (½½ <i>z</i> ) | 0.3949(1)                                   | 0.13(1) Sr<br>0.87(1) Bi | 0.025(1)                          |
| Nb        | 2 <i>h</i> (½½ <i>z</i> ) | 0.1143(1)                                   | 1 Nb                     | 0.011(1)                          |
| <i>X</i>  | 1 <i>b</i> (00½)          | ½                                           | 1 Cl                     | 0.019(2)                          |
| O1        | 1 <i>c</i> (½½0)          | 0                                           | 1 O                      | 0.025 <sup>1</sup>                |
| O2        | 8 <i>s</i> (0 <i>xz</i> ) | <i>x</i> = 0.543(9)<br><i>z</i> = 0.1070(4) | 1 O                      | 0.025 <sup>1</sup>                |
| O3        | O3 (½½ <i>z</i> )         | 0.2104(8)                                   | 1 O                      | 0.025 <sup>1</sup>                |
| O4        | O4 (0½ <i>z</i> )         | 0.3357(5)                                   | 1 O                      | 0.025 <sup>1</sup>                |

<sup>1</sup> Not refined.

### **SrCaBi<sub>3</sub>Nb<sub>2</sub>O<sub>11</sub>Cl**

Space group *P4/nmm* (# 129), *Z* = 2, *a* = 3.88007(6) Å, *c* = 18.3983(4) Å; single phase sample.

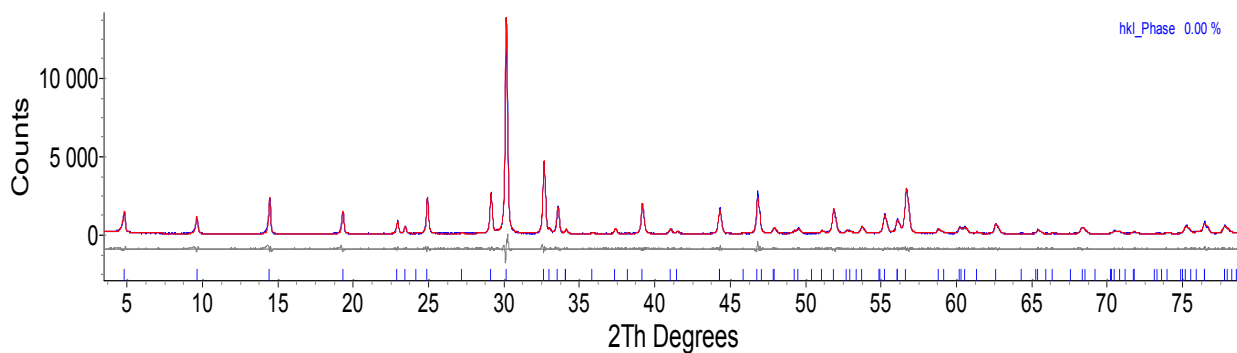

### **Sr<sub>2</sub>Bi<sub>3</sub>Nb<sub>2</sub>O<sub>11</sub>Cl**

Space group *P4/nmm* (# 129), *Z* = 2, *a* = 3.91425(5) Å, *c* = 18.4721(3) Å; single phase sample.

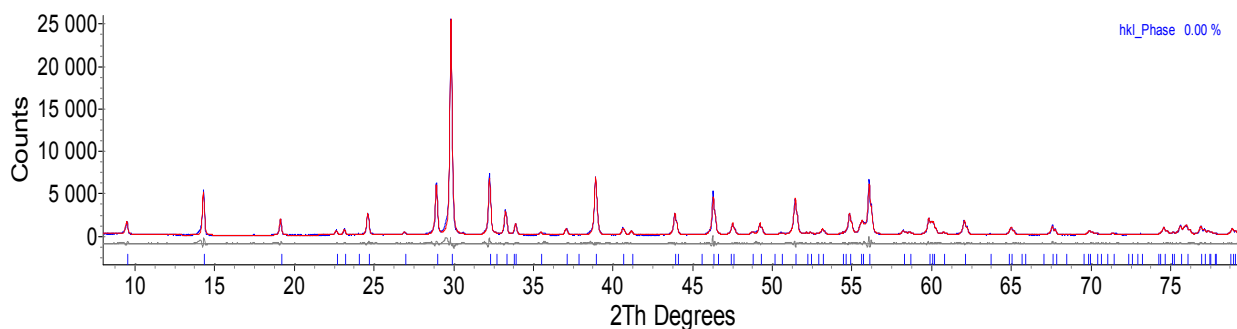

### **Sr<sub>2</sub>Bi<sub>3</sub>Nb<sub>2</sub>O<sub>11</sub>Br**

Space group *P4/nmm* (# 129), *Z* = 2, *a* = 3.92218(4) Å, *c* = 18.6618(2) Å; 97.6(1) wt. % target phase, 2.4 (1) wt. % SrBi<sub>2</sub>Nb<sub>2</sub>O<sub>9</sub>.

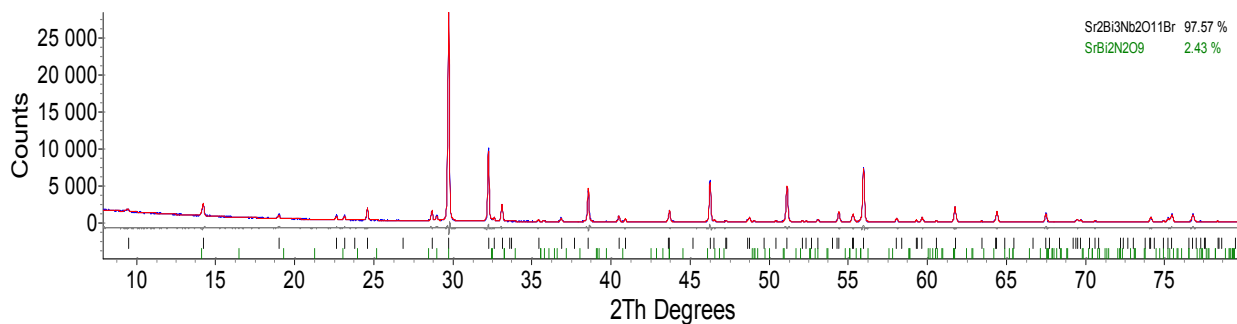

**Figure S1.** Typical LeBail fits for the Me<sup>1</sup>Me<sup>2</sup>Bi<sub>3</sub>Nb<sub>2</sub>O<sub>11</sub>X oxyhalides.

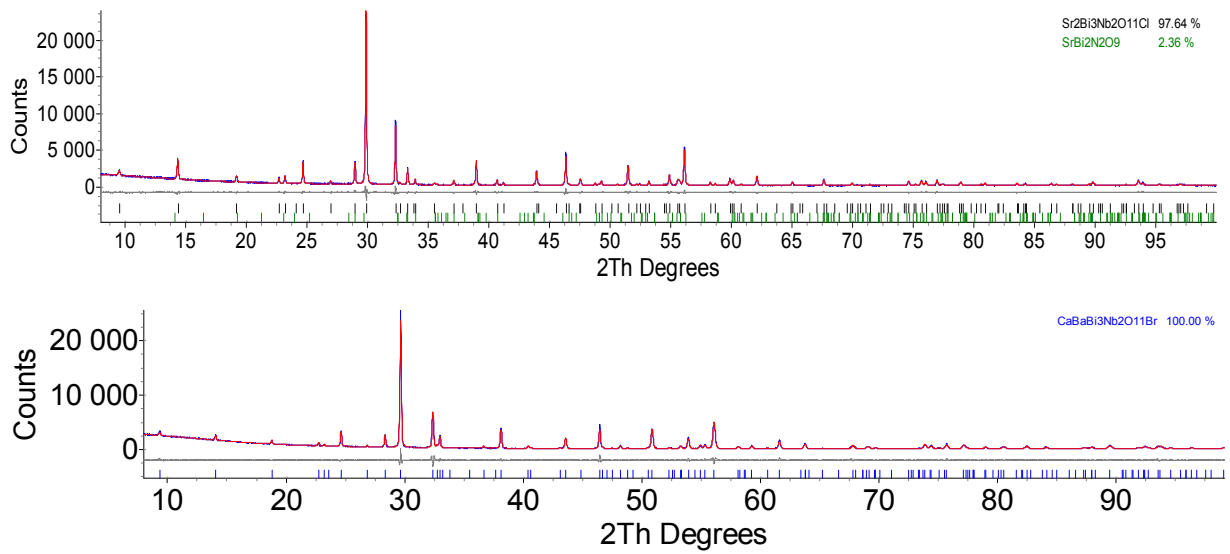

**Figure S2.** Experimental, calculated and difference PXRD profiles for  $\text{Sr}_2\text{Bi}_3\text{Nb}_2\text{O}_{11}\text{Cl}$  (top) and  $\text{BaCaBi}_3\text{Nb}_2\text{O}_{11}\text{Br}$  (bottom) for  $2\theta < 100^\circ$ .

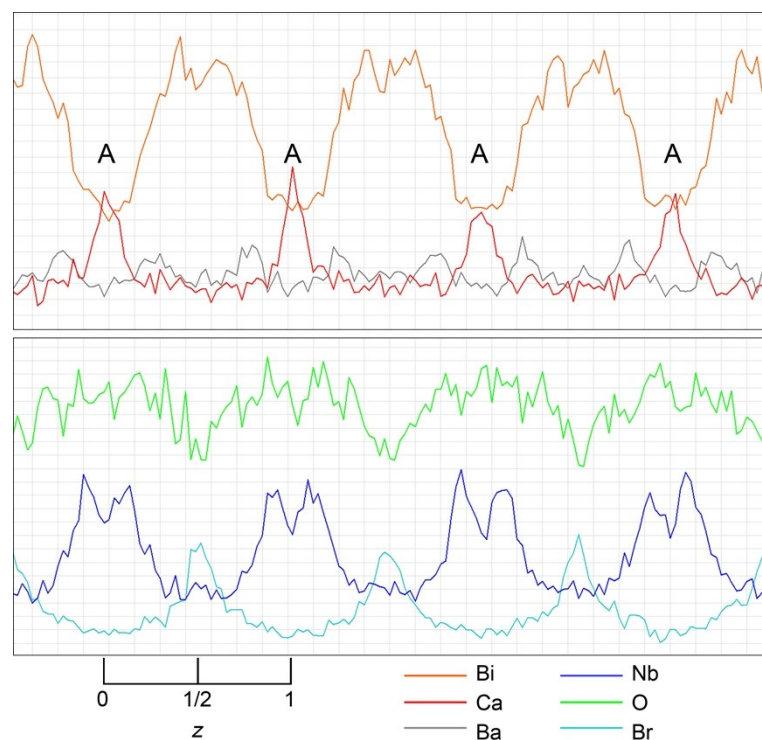

**Figure S3.** Elemental profiles for  $\text{BaCaBi}_3\text{Nb}_2\text{O}_{11}\text{Br}$  measured along the  $c$  direction (the unit cell is outlined, the  $A$  positions are indicated).
